# Supplementary material for: Synthesis, characterization and multi-dimensional application approach for two distinctive tetra nuclear, first-time reported, Fe3+/Hg2+ and Fe3+/Cd2+ clusters from a new Fe3+ containing metalloligand
Source: Royal Society of Chemistry journal article supplement (doi:10.1039/d2nj03357g), 2022-01-01
Supplement: d2nj03357g1.pdf [file d2nj03357g1.pdf]

## Supporting information file

### **Synthesis, Characterization and Multi Dimensional Application Approach of Two Distinctive Tetra Nuclear First Time Reported Fe<sup>3+</sup>/Hg<sup>2+</sup> and Fe<sup>3+</sup>/Cd<sup>2+</sup> clusters from a New Fe<sup>3+</sup> Containing Metalloligand**

SoumikLaha,<sup>a</sup> Dibyendu Sathapathi,<sup>b</sup> Mainak Das,<sup>c</sup> Manik Das,<sup>b</sup> Partha Pratim Ray,<sup>c</sup> Arijit Bag<sup>d</sup>, Bidhan Chandra Samanta,<sup>e</sup> Uttam Kumar Das<sup>f\*</sup>, Tithi Maity<sup>b\*</sup>

<sup>a</sup> IICB, Kolkata, West Bengal, India

<sup>b</sup> Department of Chemistry, Prabhat Kumar College, Contai, Contai, Purba Medinipur, West Bengal, India

<sup>c</sup> Department of Physics, Jadavpur University, Kolkata, India

<sup>d</sup>School of Natural and Applied Sciences, Maulana Abul Kalam Azad University of Technology, West Bengal, India

<sup>e</sup> Mugberia Gangadhar Mahavidyalaya, Purbamedinipur, West Bengal India

<sup>f</sup> Department of Chemistry, School of Physical Science, Mahatma Gandhi Central University, Bihar, India.

Email: [titlipkc2008@gmail.com](mailto:titlipkc2008@gmail.com), [uttamkumardas@mgcub.ac.in](mailto:uttamkumardas@mgcub.ac.in)

## Contents

| Figure Number   | Figure caption                                                                                                                                                                                        | Page number |
|-----------------|-------------------------------------------------------------------------------------------------------------------------------------------------------------------------------------------------------|-------------|
| <b>Fig. S1</b>  | FTIR spectrum of <b>MC1</b>                                                                                                                                                                           | <b>S3</b>   |
| <b>Fig. S2</b>  | FTIR spectrum of <b>MC2</b>                                                                                                                                                                           | <b>S3</b>   |
| <b>Fig. S3</b>  | FTIR spectrum of <b>MC3</b>                                                                                                                                                                           | <b>S4</b>   |
| <b>Fig. S4</b>  | UV spectrum of a) <b>MC1</b> b) <b>MC2</b> c) <b>MC3</b>                                                                                                                                              | <b>S5</b>   |
| <b>Fig. S5</b>  | Mass spectra of <b>MC1</b>                                                                                                                                                                            | <b>S5</b>   |
| <b>Fig. S6</b>  | Mass spectra of a) <b>MC2</b> b) <b>MC4</b>                                                                                                                                                           | <b>S6</b>   |
| <b>Fig. S7</b>  | Mass spectra of <b>MC3</b>                                                                                                                                                                            | <b>S7</b>   |
| <b>Fig. S8</b>  | a) The overall packing of the crystal structure b) Molecular plot of <b>MC1</b>                                                                                                                       | <b>S7</b>   |
| <b>Fig. S9</b>  | a) The overall packing of the crystal structure b) Molecular plot of <b>MC2</b>                                                                                                                       | <b>S8</b>   |
| <b>Fig. S10</b> | Molecular Plot of <b>MC3</b>                                                                                                                                                                          | <b>S8</b>   |
| <b>Table S1</b> | Hydrogen bonding parameter of <b>MC1</b>                                                                                                                                                              | <b>S9</b>   |
| <b>Fig. S11</b> | Binding constant determination of a) <b>MC1</b> -Hg(II) adduct b) <b>MC1</b> -Cd(II) adduct                                                                                                           | <b>S9</b>   |
| <b>S12</b>      | Band gap calculation of <b>MC4</b>                                                                                                                                                                    | <b>S9</b>   |
| <b>Fig. S13</b> | a) $dV/d\ln I$ vs. $I$ and $H(I)$ vs. $I$ curves for device-C b) Current-voltage characteristics plot for device A, B, C under dark condition and $\log I$ vs $V$ plot for device A, B and C.         | <b>S10</b>  |
| <b>Fig. S14</b> | Rate of methylene blue degradation in presence of a) only complex b) complex in presence of $H_2O_2$ .                                                                                                | <b>S10</b>  |
| <b>Table S2</b> | Alteration of the absorbance of methylene blue dye with time in presence of a) <b>MC2</b> b) <b>MC3</b> in presence of $H_2O_2$ upon irradiation of photons                                           | <b>S11</b>  |
| <b>Fig. S15</b> | Plot of $\ln(C_0/C)$ vs time for the pseudo first order kinetics curves of the photocatalytic degradation of methylene blue by using <b>MC3</b> catalyst in presence of stoichiometric inhibitor EDTA | <b>S11</b>  |

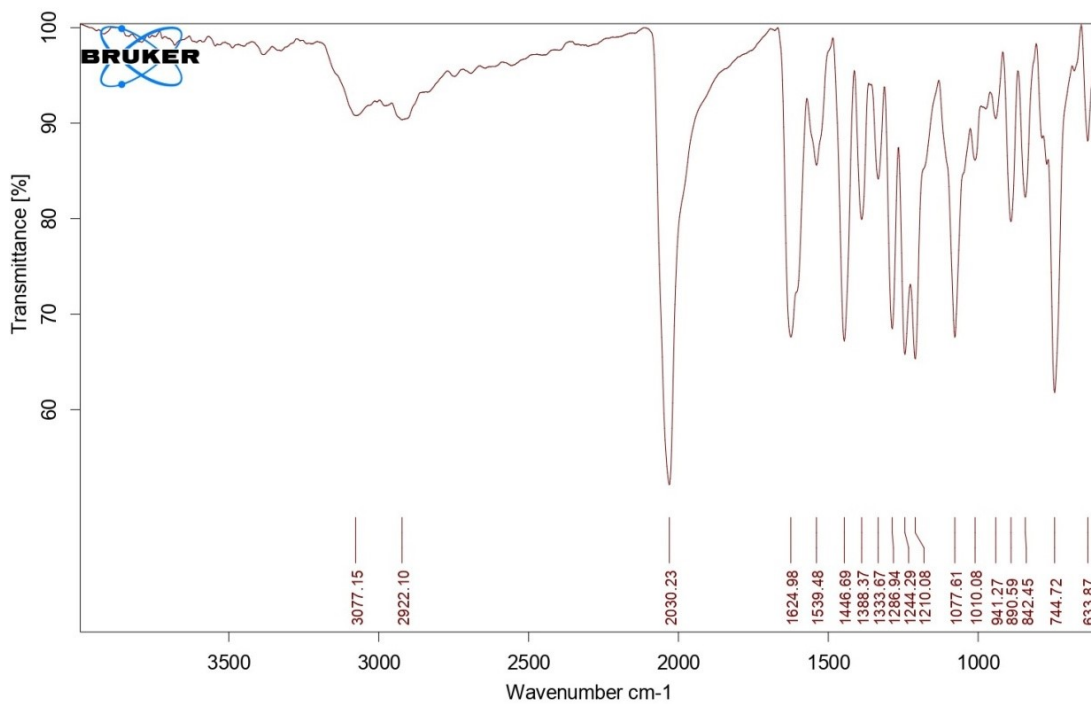

**Fig. S1** FTIR spectrum of MC1

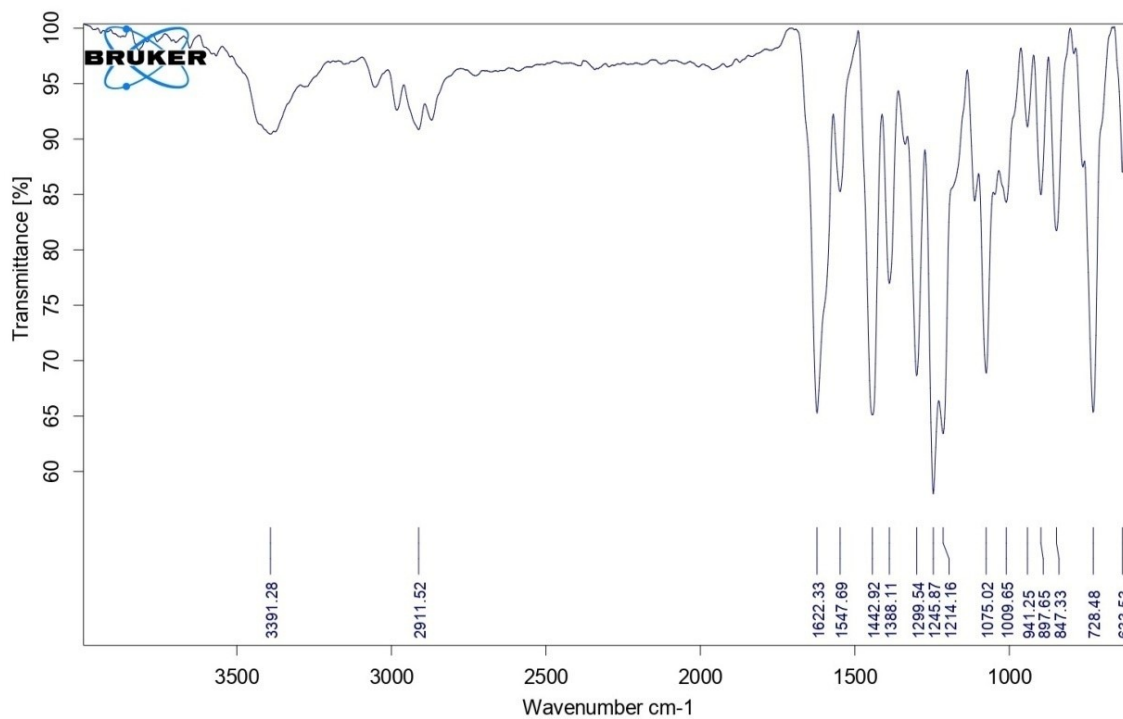

**Fig. S2:** FTIR spectrum of MC2

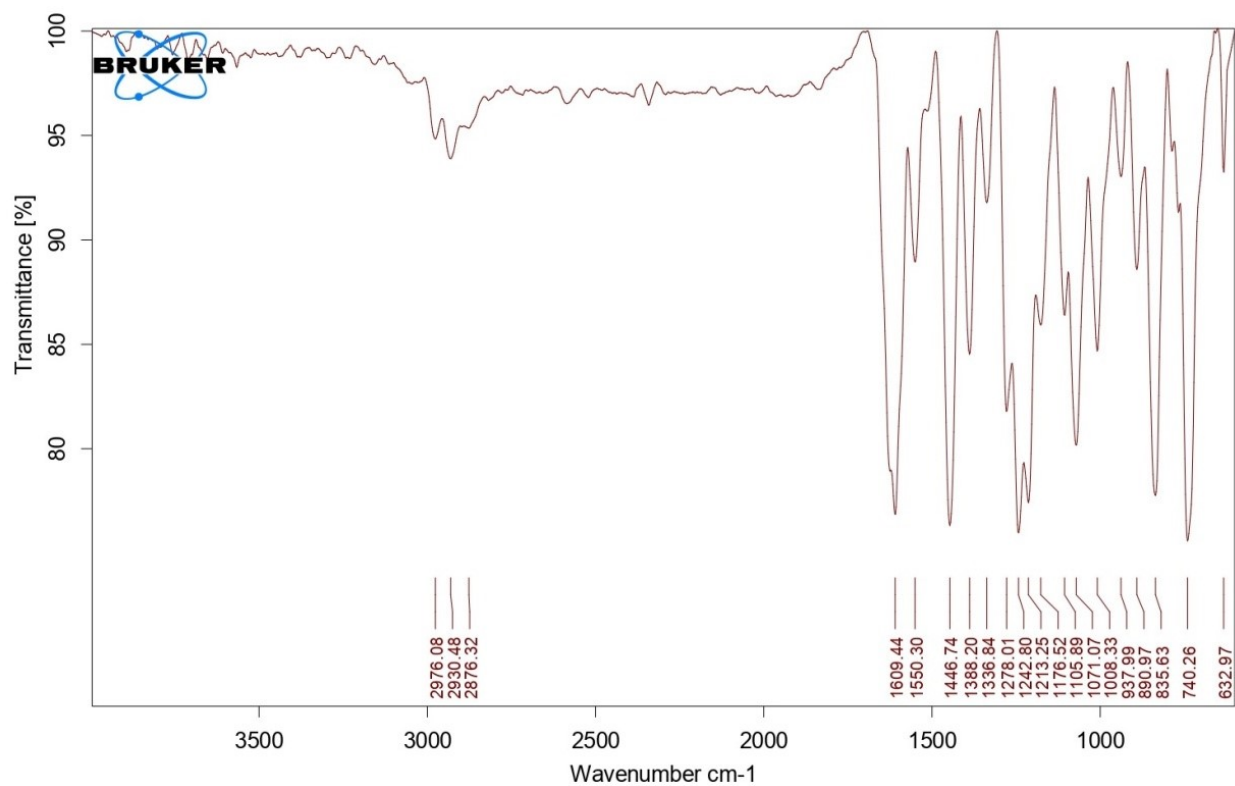

**Fig. S3:** FTIR spectrum of MC3

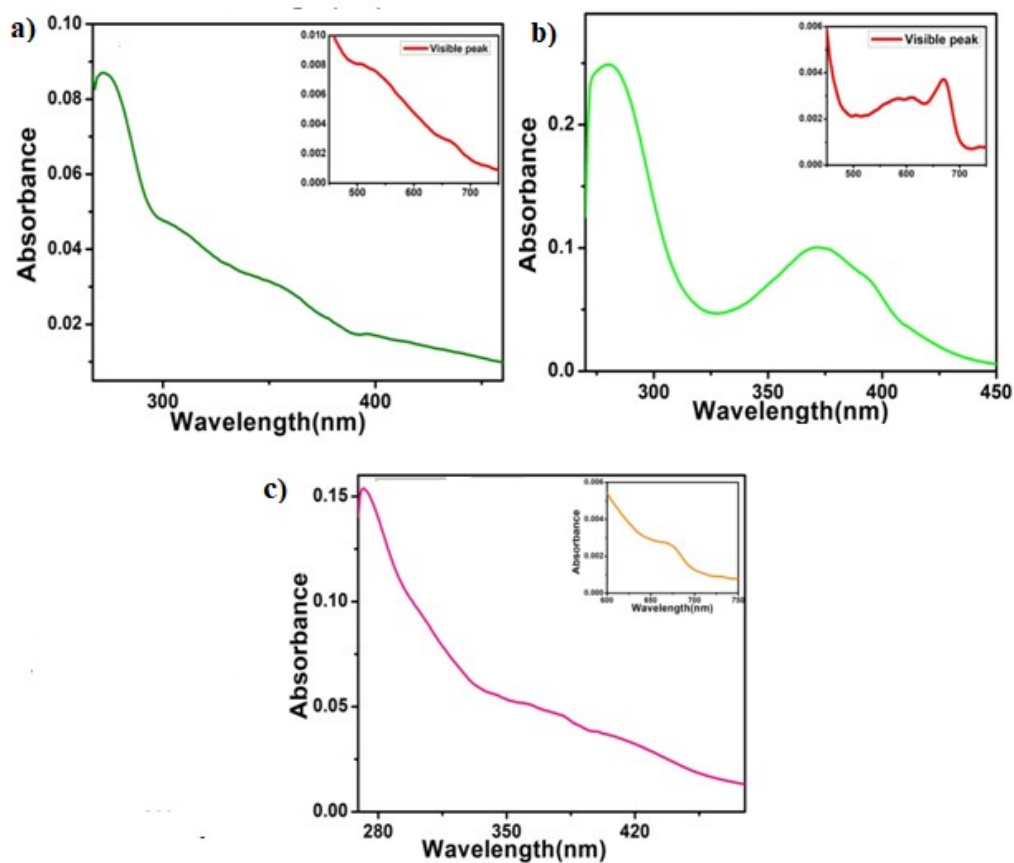

Fig. S4: UV spectrum a) MC1 b) MC2 c) MC3

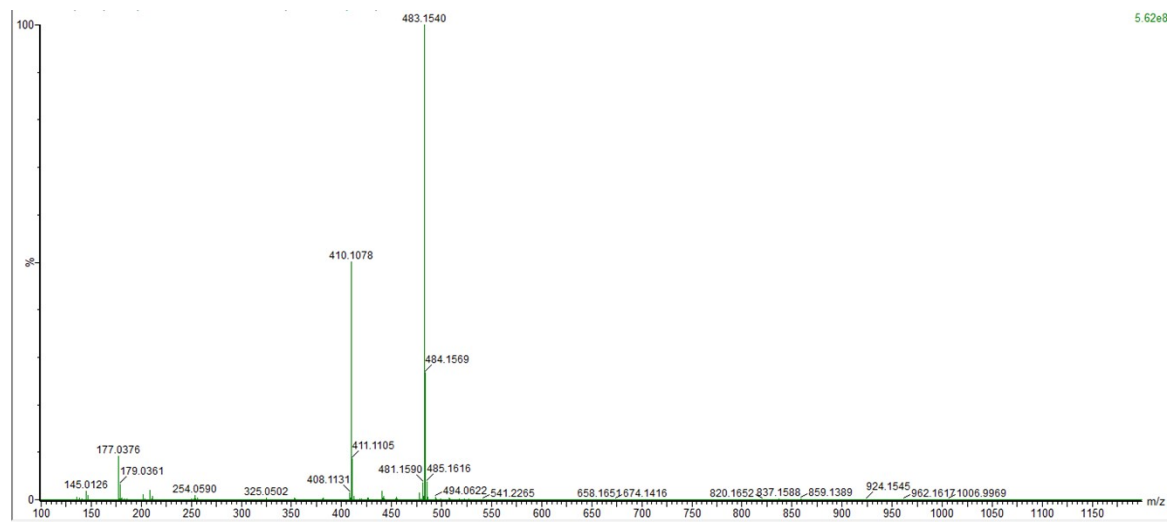

Fig. S5 Mass spectra of MC1

a)

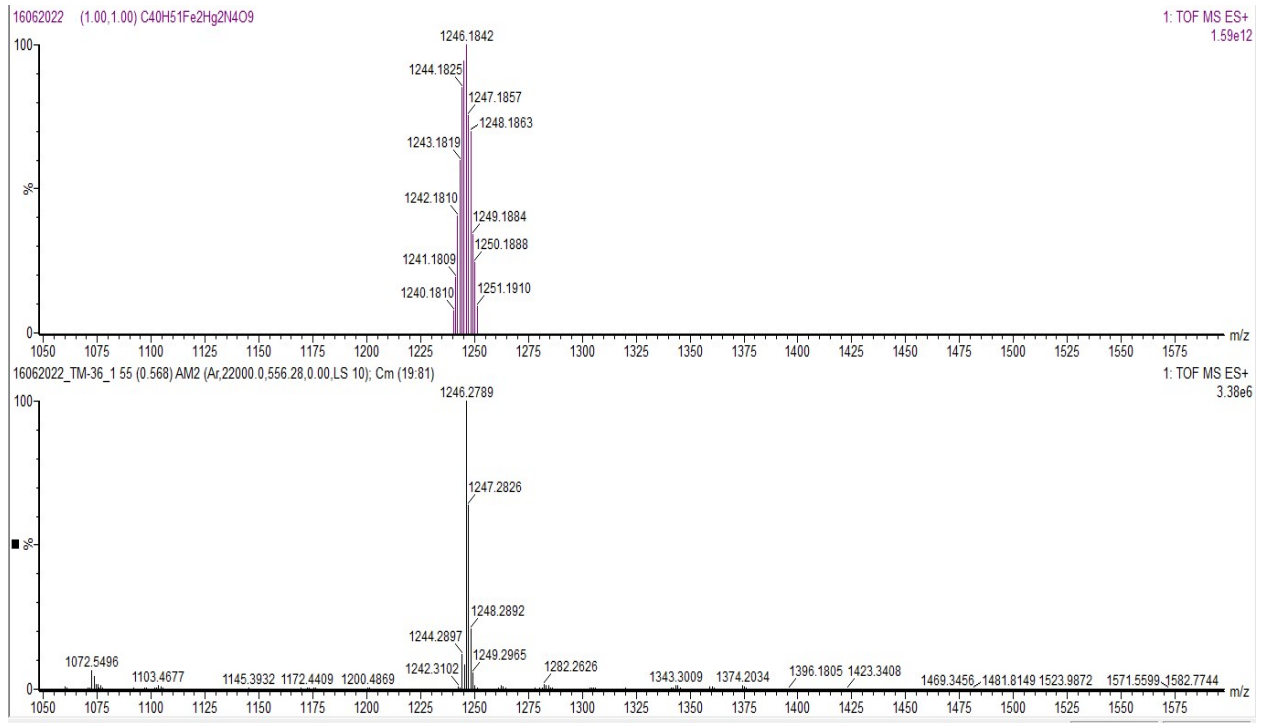

b)

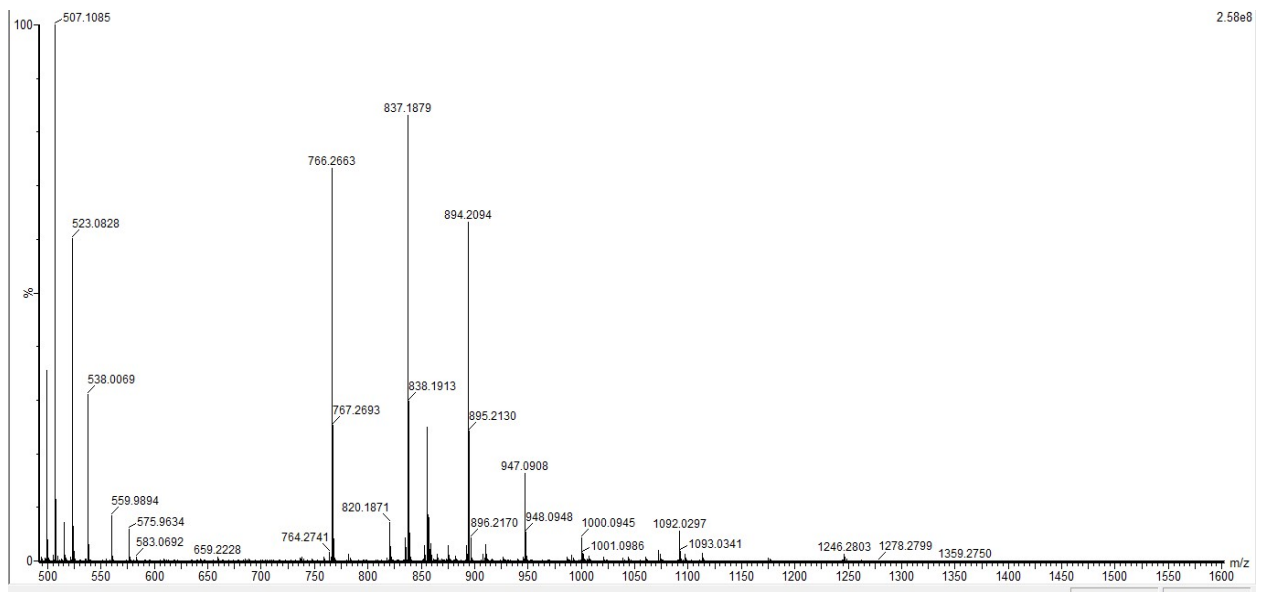

Fig. S6 Mass spectra of a) MC2 b) MC4

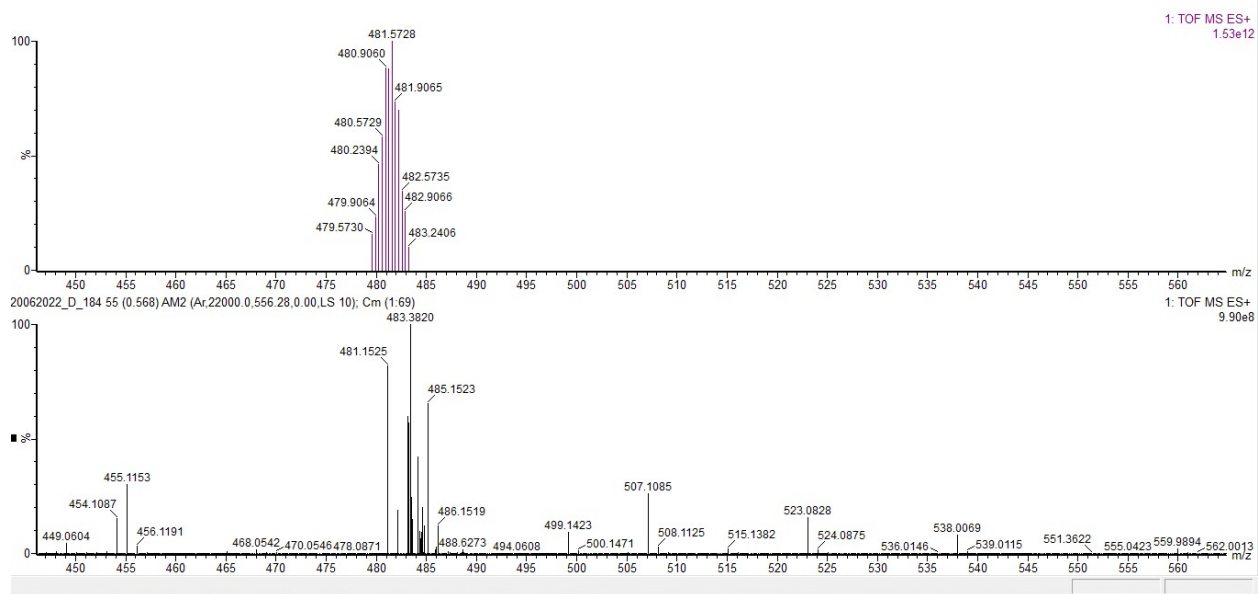

**Fig. S7** Mass spectra of MC3

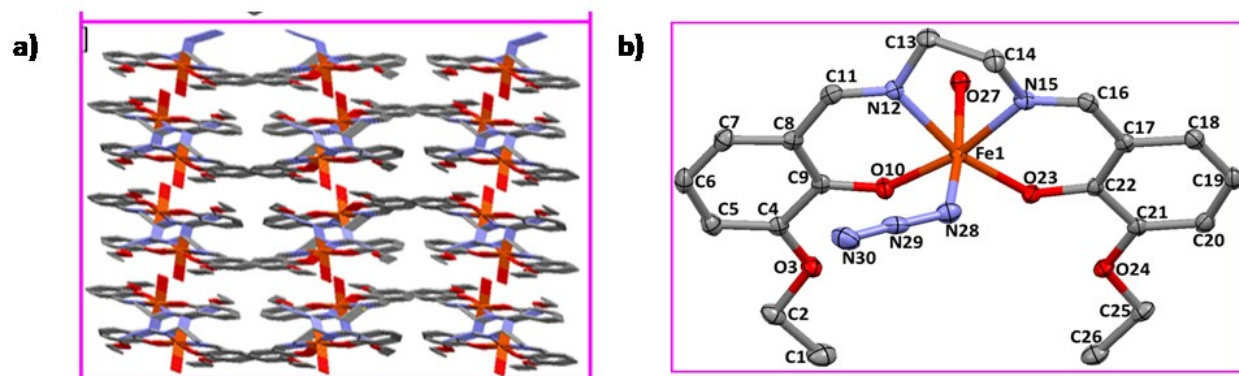

**Fig. S8:** a) The overall packing of the crystal structure b) Molecular plot of MC1

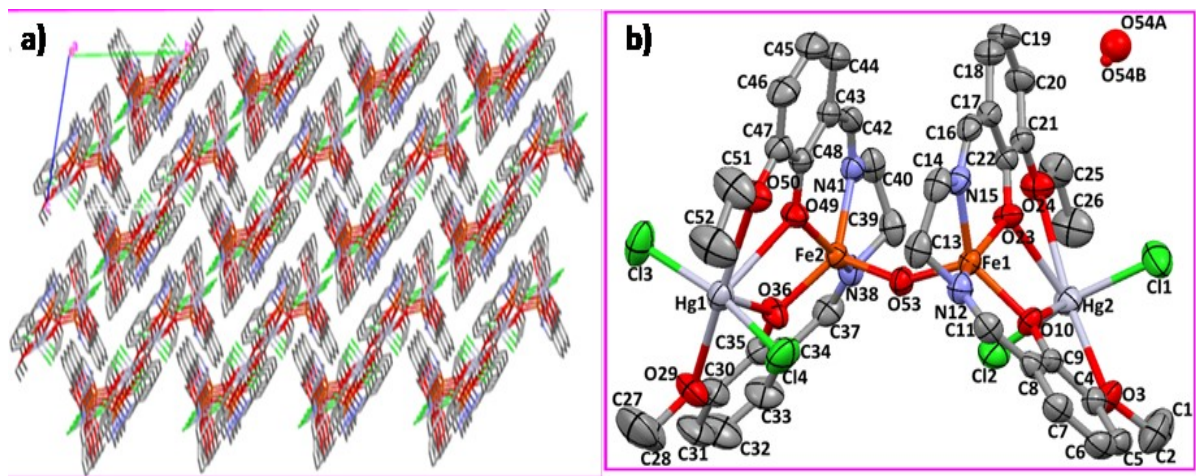

Fig. S9: a) The overall packing of the crystal structure b) Molecular plot of MC2

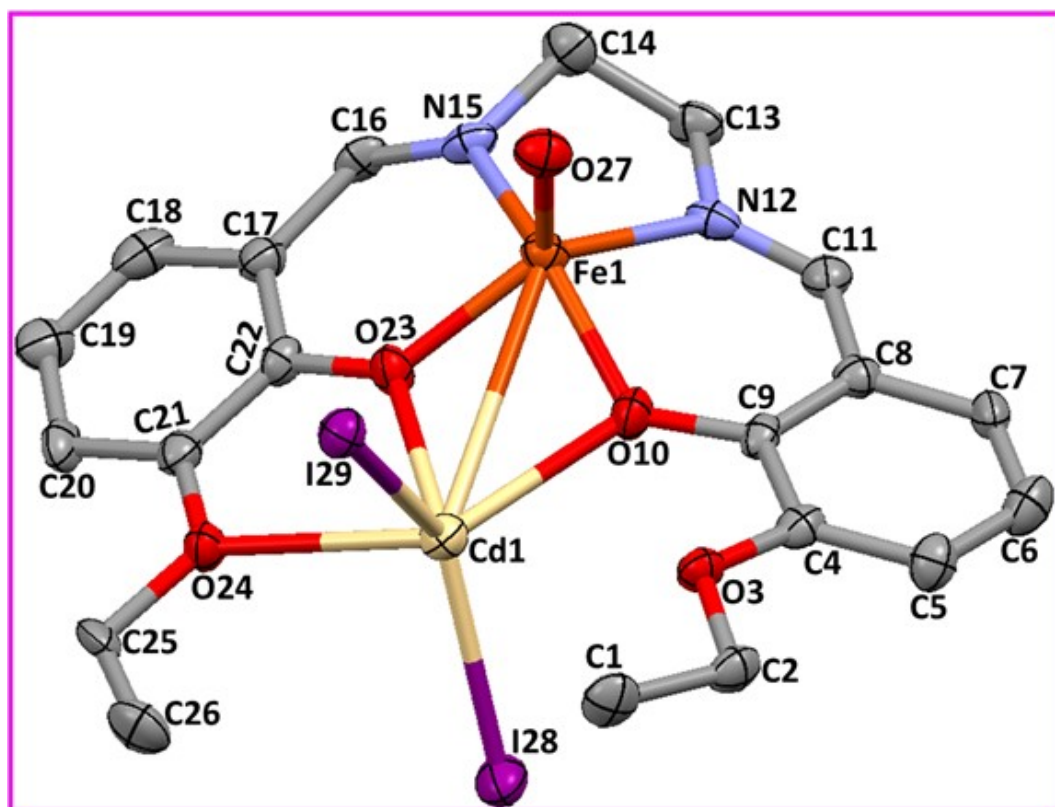

Fig. S10: Molecular plot of MC3



**Table S1:** Hydrogen bonding parameter of MC1

| D-H...A            | D-H (Å) | H...A (Å) | D...A (Å) | D-H...A (°) | Symmetry operation for A |
|--------------------|---------|-----------|-----------|-------------|--------------------------|
| O(27)–H(27A)•••O23 | 0.804   | 2.199     | 2.965     | 159.47      | -x+1, -y+1, -z+1         |
| O(27)–H(27B)•••O10 | 0.674   | 2.252     | 2.835     | 145.73      | -x+1, -y+1, -z+1         |

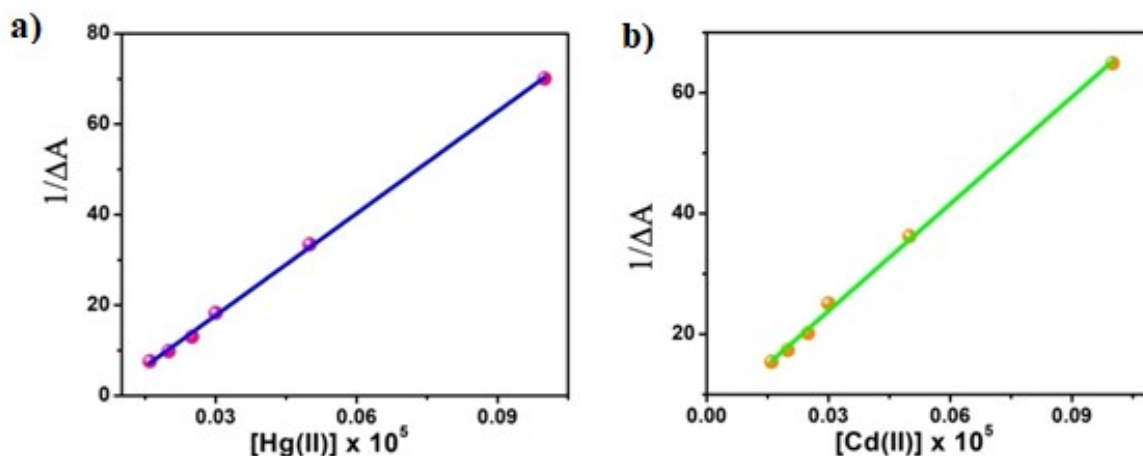

**Fig. S11:** Binding constant determination of a) MC1-Hg(II) adduct c) MC1-Cd(II) adduct

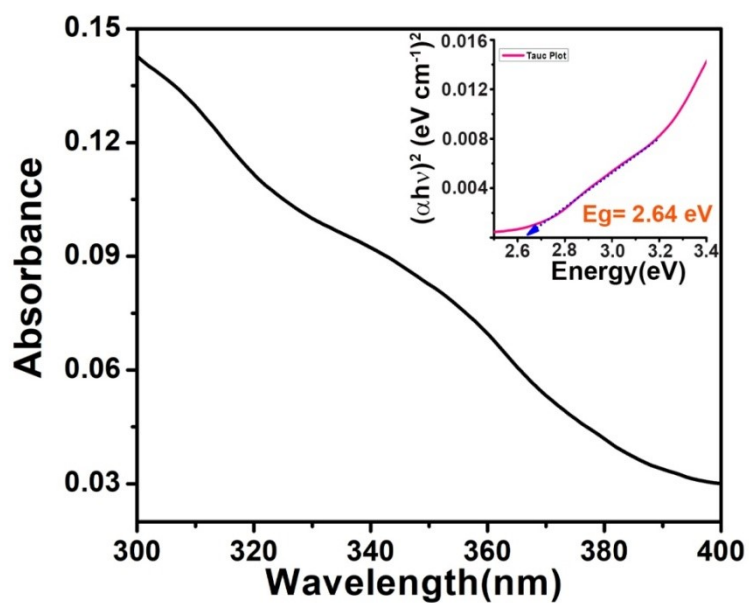

**Fig. S12:** Band gap calculation of MC4

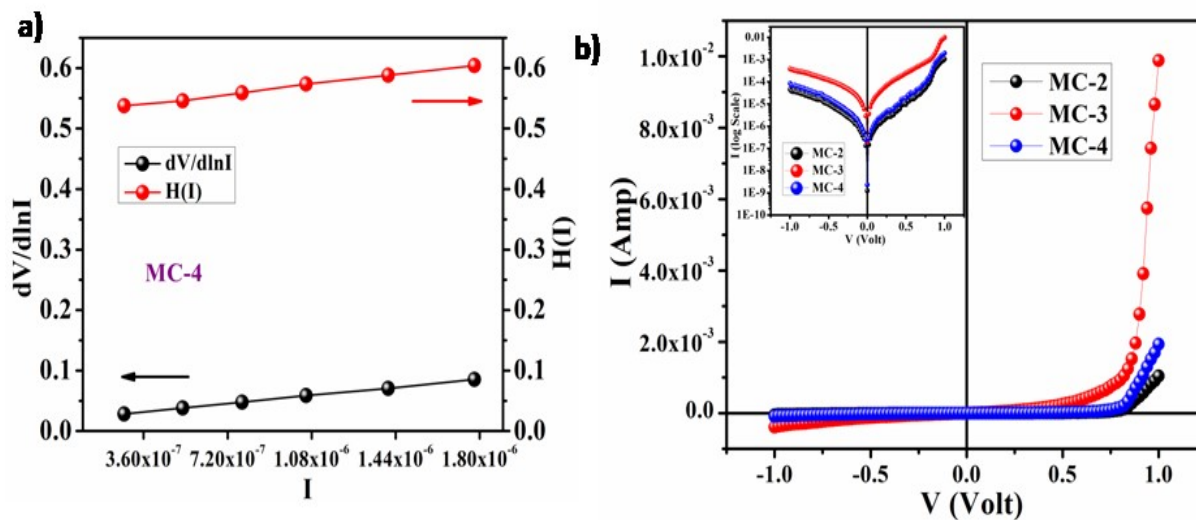

**Fig. S13** a)  $dV/d\ln I$  vs.  $I$  and  $H(I)$  vs.  $I$  curves for device-C b) Current-voltage characteristics plot for device A, B, C under dark condition and  $\log I$  vs  $V$  plot for device A, B and C.

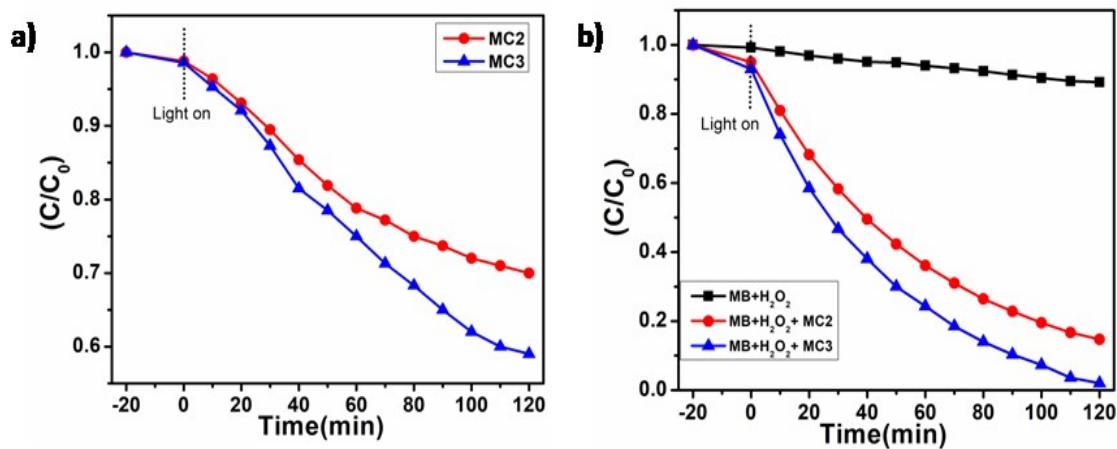

**Fig. S14:** Rate of methylene blue degradation in presence of a) only complex b) complex in presence of  $H_2O_2$ .

**Table S2:** Photocatalytic Methylene blue dye degradation rate constant by changing the different parameter

| Sample composition                         | Rate constant in $\text{min}^{-1}$ of MB dye degradation | pH values | Rate constant in $\text{min}^{-1}$ of MB dye degradation by <b>MC3</b> catalysis | Stoichiometry change of <b>MC3</b> catalyst | Rate constant in $\text{min}^{-1}$ |
|--------------------------------------------|----------------------------------------------------------|-----------|----------------------------------------------------------------------------------|---------------------------------------------|------------------------------------|
| Only in presence of $\text{H}_2\text{O}_2$ | 0.0015                                                   | 3         | 0.0034                                                                           | 10 mg of <b>MC3</b>                         | 0.015                              |
| $\text{H}_2\text{O}_2$ + <b>MC2</b>        | 0.0156(10 times)                                         | 7         | .009                                                                             | 20 mg of <b>MC3</b>                         | 0.256                              |
| $\text{H}_2\text{O}_2$ + <b>MC3</b>        | 0.0259(17 times)                                         | 9         | .010                                                                             |                                             |                                    |
|                                            |                                                          | 11        | .013                                                                             | 30 mg of <b>MC3</b>                         | 0.272                              |

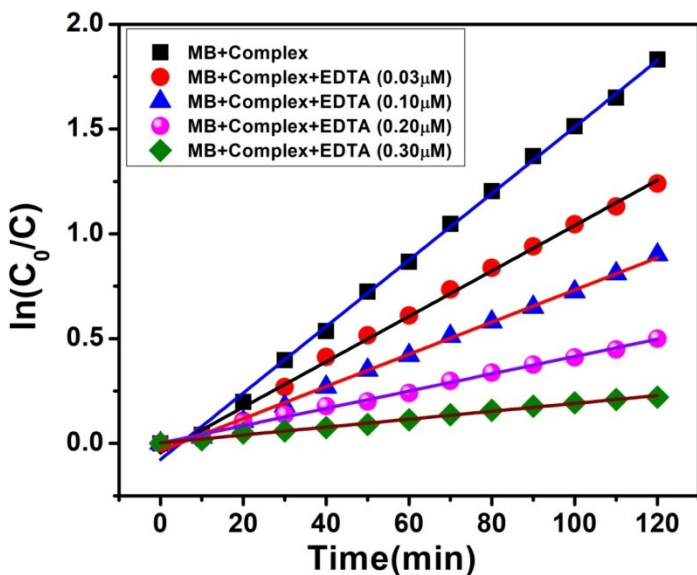

**Fig. S15:** Plot of  $\ln(C_0/C)$  vs time for the pseudo first order kinetics curves of the photocatalytic degradation of methylene blue by using **MC3** catalyst in presence of stoichiometric inhibitor EDTA
